# Supplementary material
Source: Research Square preprint supplement (doi:10.21203/rs.3.rs-10206188/v1)
Supplement: Supplementary file 1 [file 1bedcdd2f6416f7e29845e13.docx]

**Supplementary Information**

***Figure S1. Cross-amplitude generalization of the latent representation****.* ***(a)****Cosine similarity between half- and full-amplitude OFF-to-ON distance vectors, shown by stimulation frequency.****(b)****Pearson correlations between half- and full amplitude mean latent positions for each dimension, with 95% confidence intervals. All dimensions show significant cross-amplitude correlations (all p<0.05).*

***Figure S2. Reproducibility of GCE latent structure across random weight initializations.*** *The GCE was retrained ten times from independent random initializations, holding architecture (K=1, L=5, λ=0.068), classifier, and data split fixed. (A) For each retrained encoder, the best-correlating 2D subspace within the non-causal β-dimensions (dims 1–5; 10 candidate pairs) was identified by Spearman correlation with normalized total motor score on full-amplitude data. Dots show the best |ρ| per initialization; the winning pair is labelled. Dashed line: pre-specified pass floor (|ρ| > 0.35); dotted line: reported value (ρ = 0.497). (B) Per-dimension AUROC for ON-vs-OFF stimulation detection across all six latent dimensions. dim₀ ranked first in every initialization. Across all ten retrains: therapeutic axis pass rate 10/10 (100%), median |ρ| = 0.524 (range 0.44–0.62); dim₀ detection pass rate 10/10 (100%), median AUROC = 0.925 (range 0.907–0.935). The reported result (ρ = 0.497) falls within the range observed across retrains, confirming that the therapeutic signal within the β-subspace and the stimulation-detection role of dim₀ are stable properties of the GCE objective.*

***Supplementary Methods — Reproducibility of latent structure across random initializations***

*To assess whether the latent geometry identified by the GCE reflects stable properties of the objective rather than artefacts of a particular weight initialization, the model was retrained ten times from independent random initializations, holding the architecture (K=1, L=5, λ=0.068), pre-trained classifier, and data split fixed. For each retrained encoder, two properties were evaluated on the full-amplitude development cohort: (i) the best-correlating 2D subspace within the non-causal β-dimensions (dims 1–5; 10 candidate pairs assessed by Spearman ρ with normalized total motor score), and (ii) the per-dimension AUROC for ON-vs-OFF stimulation detection, with pass criterion that dim₀ rank first among all six dimensions. All ten retrains passed both criteria (therapeutic axis: median |ρ| = 0.524, range 0.44–0.62; dim₀ detection: median AUROC = 0.925, range 0.907–0.935).*

***Table S1.*** *Spearman correlations between OFF-referenced latent signed distance and normalized clinical improvement at full amplitude ( patient-condition pairs). Positive coefficients indicate that more positive, or less negative, distance is associated with greater improvement. Dim 0 denotes the stimulation-detection component; Dims 1–5 denote auxiliary components. *, **.*

| **Latent Space Metric** | **Total Score** | **Rigidity** | **Bradykinesia** | **Tremor** |
| --- | --- | --- | --- | --- |
|  | −0.032 | 0.048 | 0.034 | 0.187 |
|  | 0.425** | 0.210 | 0.294 | −0.062 |
|  | 0.405* | 0.479** | 0.242 | 0.327 |
|  | −0.271 | −0.288 | −0.159 | −0.207 |
|  | −0.101 | 0.038 | −0.078 | 0.012 |
|  | −0.153 | 0.238 | −0.246 | 0.280 |
|  | 0.497** | 0.434** | 0.323 | 0.193 |
|  | 0.394* | 0.451** | 0.247 | 0.197 |

***Table S2.****Convergence of correlation analyses for the primary therapeutic metric* *( versus normalized total score improvement) across four statistical methods.*

| **Method** | **Correlation** | **P-value** |
| --- | --- | --- |
| Spearman | ρ = 0.497 | 0.002 |
| Pearson | r = 0.536 | 0.0008 |
| Kendall | τ = 0.338 | 0.004 |
| Distance correlation | dCor = 0.546 | 2.8×10⁻⁹ |

***Table S3.*** *Frequency-specific values for the auxiliary Dim 1+2 metric and clinical outcome at full amplitude. The signed distance (dims₁₂^signed) is the OFF-referenced sum Δz₁ + Δz₂ and the Range column gives its minimum and maximum; the Euclidean distance is the magnitude of the same OFF-referenced displacement, √(Δz₁² + Δz₂²). Clinical improvement is reported as normalized total score change; negative values indicate worsening. n = 9 patients per frequency. Values are mean ± SD.*

| **Frequency** | **Mean Signed Distance (** | **Range** | **Mean Euclidean Distance** | **Mean Clinical Improvement** | **Patients Worsened** |
| --- | --- | --- | --- | --- | --- |
| 125 Hz | −0.14 ± 1.04 | −2.68 to +0.83 | 0.69 ± 0.63 | +0.27 ± 0.19 | 0/9 (0%) |
| 110 Hz | −0.17 ± 0.58 | −1.17 to +0.41 | 0.50 ± 0.27 | +0.27 ± 0.22 | 1/9 (11%) |
| 85 Hz | −0.72 ± 0.80 | −1.85 to +0.54 | 0.85 ± 0.41 | +0.16 ± 0.22 | 1/9 (11%) |
| 55 Hz | −1.88 ± 0.76 | −3.27 to −0.94 | 1.49 ± 0.66 | +0.04 ± 0.26 | 4/9 (44%) |

***Table S4.****Linear mixed-effects models relating within-patient centered latent values to normalized scores.* ***Model:****.*

***observations (9 patients × 4 frequencies × 2 amplitudes).***

*Dim 0 denotes the stimulation-detection component, Dim 1 and 2 denote physiologic latent components. Permutation p-values are from predictor-permutation testing (N = 5,000, seed = 42).* *· p < 0.1, * p < 0.05.*

1. ***Model:***

| **Dimension** | **β (individual)** | **p (****individual)** | **p_perm (individual)** | **β (joint Dims 1+2)** | **p (joint)** | **p_perm (joint)** |
| --- | --- | --- | --- | --- | --- | --- |
| Dim 0 (neg. ctrl) | +0.889 | 0.344 | — | — | — | — |
| Dim 1 | −0.498 | 0.090· | 0.126 | −0.573 | 0.044* | 0.081· |
| Dim 2 | −0.586 | 0.037* | 0.064· | −0.648 | 0.019* | 0.044* |

1. ***Model:***

| **Dimension** | **β (individual)** | **p (individual)** | **p_perm (individual)** | **β (joint Dims 1+2)** | **p (joint)** | **p_perm (joint)** |
| --- | --- | --- | --- | --- | --- | --- |
| Dim 0 (neg. ctrl) | +0.705 | 0.537 | — | — | — | — |
| Dim 1 | −0.715 | 0.043* | 0.062*·* | −0.802 | 0.019* | 0.037* |
| Dim 2 | −0.665 | 0.052*·* | 0.078*·* | −0.752 | 0.024* | 0.046* |

1. ***Model:***

| **Dimension** | **β (individual)** | **p (individual)** | **p_perm (individual)** | **β (joint Dims 1+2)** | **p (joint)** | **p_perm (joint)** |
| --- | --- | --- | --- | --- | --- | --- |
| Dim 0 (neg. ctrl) | +2.495 | 0.129 | — | — | — | — |
| Dim 1 | −0.016 | 0.975 | 0.976 | −0.084 | 0.876 | 0.880 |
| Dim 2 | −0.571 | 0.264 | 0.305 | −0.581 | 0.263 | 0.299 |

***Table S5.*** *Machine-learning model parameters. Parameters of the stimulation classifier and the GCE encoder and decoder networks. Architecture is given as input × hidden × latent units; the discriminative dimension and non-discriminative dimensions apply to the GCE latent space only.*

| Network parameter | *Classifier network* | *Encoder (feature compression)* | *Decoder (feature reconstruction)* |
| --- | --- | --- | --- |
| Architecture (input × hidden × latent) | 70 × 128 × 2 | 70 × 512 × 512 × 6 | 6 × 512 × 70 |
| Activation function | ReLU (softmax head) | ReLU (linear μ, log σ² heads) | ReLU (linear head) |
| Loss function | Cross-entropy | MSE + KL divergence − causal mutual information | |
| Optimizer | AdamW | AdamW | |
| Learning rate | 0.0005 | 0.0005 | |
| Weight decay | 0.005 | 0.005 | |
| Dropout | 0.3 | none | |
| Discriminative dimension | — | 1 | |
| Non-discriminative dimensions | — | 5 | |
| λ (data-fidelity weight) | — | 0.068 | |
| MI Monte-Carlo samples (α, β) | — | 200, 200 | |
| Batch size | 8 | 8 | |
| Epochs | 50 | 50 | |

***Table S6.*** Canonical spectral power features carried through the identical analyses applied to the latent dimensions. Panel A, linear mixed-effects models for normalized total motor improvement (norm_total ~ feature_wc + amp + C(frequency) + (1|patient); n=72; permutation p from 5,000 predictor permutations, mean of three seeds). Panel B, Spearman correlations (ρ, with p-value in parentheses) between OFF-referenced signed change and normalized clinical improvement at full amplitude (n=36 patient-condition pairs). Panel C, mean OFF-referenced signed change per stimulation frequency at full amplitude (n=9 patients per frequency), with normalized clinical improvement and the auxiliary Dim 1+2 distance shown for reference.

1. ***Mixed-effects model (total score)***

| **Feature** | **β** | **p** | **p_perm** |
| --- | --- | --- | --- |
| Low beta (13-20 Hz) | +0.028 | 0.475 | 0.515 |
| High beta (21-30 Hz) | −0.016 | 0.757 | 0.772 |
| Low gamma (31-50 Hz) | +0.033 | 0.416 | 0.407 |
| Finely tuned gamma (55-90 Hz) | +0.030 | 0.390 | 0.345 |

1. ***Full-amplitude correlations (signed change vs improvement, n=36)***

| **Feature** | **Total** | **Rigidity** | **Bradykinesia** | **Tremor** |
| --- | --- | --- | --- | --- |
| Low beta (13-20 Hz) | −0.146 (0.397) | 0.085 (0.622) | −0.229 (0.179) | −0.196 (0.252) |
| High beta (21-30 Hz) | −0.244 (0.152) | −0.046 (0.790) | −0.268 (0.114) | −0.241 (0.157) |
| Low gamma (31-50 Hz) | 0.092 (0.595) | −0.010 (0.955) | 0.153 (0.375) | −0.258 (0.128) |
| Finely tuned gamma (55-90 Hz) | −0.021 (0.905) | −0.039 (0.822) | 0.042 (0.808) | 0.058 (0.736) |

1. ***Mean signed change per frequency at full amplitude (n=9 per frequency)***

|  | **125 Hz** | **110 Hz** | **85 Hz** | **55 Hz** |
| --- | --- | --- | --- | --- |
| Low-beta (13–20 Hz) | −0.54 ± 0.87 | −0.63 ± 0.73 | −0.65 ± 0.75 | −0.66 ± 1.18 |
| High-beta (21–30 Hz) | −1.28 ± 0.68 | −1.27 ± 0.68 | −1.33 ± 0.56 | −1.14 ± 0.81 |
| Low-gamma (31–50 Hz) | −0.60 ± 0.80 | −0.76 ± 0.85 | −0.88 ± 0.95 | −0.22 ± 0.67 |
| Finely-tuned gamma (55–90 Hz) | −0.12 ± 0.24 | −0.10 ± 0.36 | +0.46 ± 0.58 | +0.52 ± 0.86 |
| Dims 1+2 distance (reference) | −0.14 ± 1.04 | −0.17 ± 0.58 | −0.72 ± 0.80 | −1.88 ± 0.76 |
| Norm. clinical improvement | +0.27 ± 0.19 | +0.27 ± 0.22 | +0.16 ± 0.22 | +0.04 ± 0.26 |

***Table S7.*** *Demographics and clinical scores for the* ***kinematic-cohort subjects.***

| **Subject** | **Age at manuscript preparation** | **Age at diagnosis** | **Age at surgery** | **L_Dopa_test Pre DBS (MDS-UPDRSIII)** | |
| --- | --- | --- | --- | --- | --- |
| **MED OFF** | **MED ON** |
| K1 | 55 | 42 | 53 | 40 | 16 |
| K2 | 55 | 47 | 54 | 60 | 12 |
| K3 | 66 | 44 | 62 | 16 | 9 |

***Table S8.*** *Pooled Spearman correlations between dims₁₂ and kinematic principal-component scores in the independent kinematic cohort. ρ and p are reported for the pooled sample (n = 14) and for a balanced subset using a uniform four recordings per patient (n = 12). PC3 scores were excluded per pre-specified criteria (Methods). The expected direction of correlation under therapeutic benefit is given in each header: DBS improvement is associated with higher FT-PC1 (tapping speed) and HM-PC2, and with lower FT-PC2 (tapping consistency) and HM-PC1 (hand-movement speed), so the expected dims₁₂ sign is positive for FT-PC1 and HM-PC2 and negative for FT-PC2 and HM-PC1; all four pooled values fall in the expected direction. ΔPC change scores (relative to per-patient stimulation-OFF baseline) were z-scored within the cohort per Methods; because Spearman ρ is rank-invariant, this does not affect the tabulated coefficients. PC scores were obtained by projecting kinematic data onto frozen principal-component loadings from Lange et al.*[*23*](#_ENREF_23) *without refitting. This cohort is from a separate study at the same center; the analysis is descriptive.*

| **Sample** | **n** | **FT-PC1 (exp +) ρ** | **p** | **FT-PC2 (exp −) ρ** | **p** | **HM-PC1 (exp −) ρ** | **p** | **HM-PC2 (exp +) ρ** | **p** |
| --- | --- | --- | --- | --- | --- | --- | --- | --- | --- |
| Pooled | 14 | +0.481 | 0.081 | −0.763 | 0.002 | −0.653 | 0.011 | +0.182 | 0.533 |
| Balanced subset | 12 | +0.441 | 0.152 | −0.748 | 0.005 | −0.629 | 0.028 | +0.070 | 0.829 |
